# Supplementary material for: The potential role of next-generation sequencing in identifying MET amplification and disclosing resistance mechanisms in NSCLC patients with osimertinib resistance
Source: Front Oncol. 2024 Oct 21;14:1470827. doi: 10.3389/fonc.2024.1470827 (PMC11532092; doi:10.3389/fonc.2024.1470827)
Supplement: Supplementary file 1 [file Table1.xlsx]

## Sheet: Sheet1
Supplenentary table 1 List of 84 genes for targeted sequencing
XRCC1	RRM1	NOTCH1	HRAS	DPYD	BRCA1
UMPS	ROS1	NOS2	GSTP1	DDR2	BRAF
UGT1A1	RET	MUTYH	FLT1	CYP3A5	BMPR1A
TYMS	PTEN	MTHFR	FGFR3	CYP3A4	AXIN2
TP53	POLE	MSH6	FGFR2	CYP2D6	ATM
TGFBR2	PMS2	MSH2	FGFR1	CYP2C9	ARID1A
TGFBR1	PIK3R1	MLH1	FBXW7	CYP2C8	APC
TCF7L2	PIK3CA	MET	ESR1	CYP19A1	AMER1
STK11	PDGFRA	MAP2K1	ERCC1	CTNNB1	ALK
SOX9	NTRK3	KRAS	ERBB4	CDKN2A	AKT1
SOD2	NTRK2	KIT	ERBB3	CDK6	ACVR2A
SMAD4	NTRK1	KEAP1	ERBB2	CDK4	ACVR1B
SMAD3	NRG1	IDH2	EPCAM	CDA	ABCC2
SMAD2	NRAS	IDH1	EGFR	BRCA2	ABCB1
